# Supplementary material for: Significant Reversal of Facial Wrinkle, Pigmented Spot and Roughness by Daily Application of Galactomyces Ferment Filtrate-Containing Skin Products for 12 Months—An 11-Year Longitudinal Skin Aging Rejuvenation Study
Source: MDPI journal article supplement (doi:10.3390/jcm12031168), 2023-02-01

**Supplementary Table S1 Chronological facial skin measurements (mean (S.D.)) in 1999 and 2010 (at 0, 2, 8, and 12M)**

|             | Hydration         | TEWL             | Wrinkle           | Spot              | Roughness         | Overall Skin Aging Score | Pore               | Sebum             | Lightness        | Yellowness       | Redness          | Elasticity        |
|-------------|-------------------|------------------|-------------------|-------------------|-------------------|--------------------------|--------------------|-------------------|------------------|------------------|------------------|-------------------|
| 1999        | *56.71<br>(7.11)  | *12.34<br>(1.83) | *0.203<br>(0.089) | *0.188<br>(0.059) | *0.728<br>(0.200) | *2.889<br>(0.905)        | *0.0156<br>(0.068) | *36.72<br>(7.95)  | *59.27<br>(1.35) | *20.39<br>(0.96) | 12.55<br>(0.92)  | *0.282<br>(0.026) |
| 0 M (2010)  | 47.76<br>(8.68)   | 13.36<br>(1.18)  | 0.370<br>(0.142)  | 0.283<br>(0.074)  | 0.864<br>(0.121)  | 4.001<br>(1.281)         | 0.0201<br>(0.089)  | 38.68<br>(8.05)   | 57.60<br>(1.29)  | 21.63<br>(0.95)  | 12.43<br>(0.76)  | 0.242<br>(0.028)  |
| 2 M (2010)  | *53.07<br>(9.24)  | *12.78<br>(1.27) | *0.326<br>(0.135) | *0.236<br>(0.064) | *0.81<br>(0.188)  | *3.528<br>(1.185)        | *0.0173<br>(0.075) | *36.7<br>(8.82)   | *58.10<br>(1.44) | 21.66<br>(0.93)  | 12.12<br>(0.74)  | *0.264<br>(0.027) |
| 8 M (2010)  | *59.61<br>(10.08) | *12.48<br>(1.79) | *0.308<br>(0.137) | *0.209<br>(0.063) | *0.788<br>(0.199) | *3.286<br>(1.058)        | *0.0159<br>(0.065) | *36.79<br>(9.95)  | *58.55<br>(1.25) | 21.27<br>(0.84)  | 12.47<br>(0.59)  | *0.279<br>(0.024) |
| 12 M (2010) | *57.64<br>(9.84)  | *12.01<br>(1.31) | *0.232<br>(0.126) | *0.197<br>(0.067) | *0.762<br>(0.196) | *3.068<br>(0.980)        | *0.0165<br>(0.071) | *36.19<br>(10.09) | *59.50<br>(1.19) | *20.50<br>(0.86) | *11.37<br>(0.77) | *0.286<br>(0.027) |

All 86 subjects were treated with twice-daily application of G3 product formulas for 12M (0M to 12M).

\*: P<0.05 compared to the measurements at 0M (2010))

**Supplementary Figure S1**

G3 products exerted the potent anti-aging effects against wrinkles, spots and roughness similarly in subjects of different age groups (30s through 50s or more). The overall skin aging score was also significantly reversed by G3 products in different age groups.

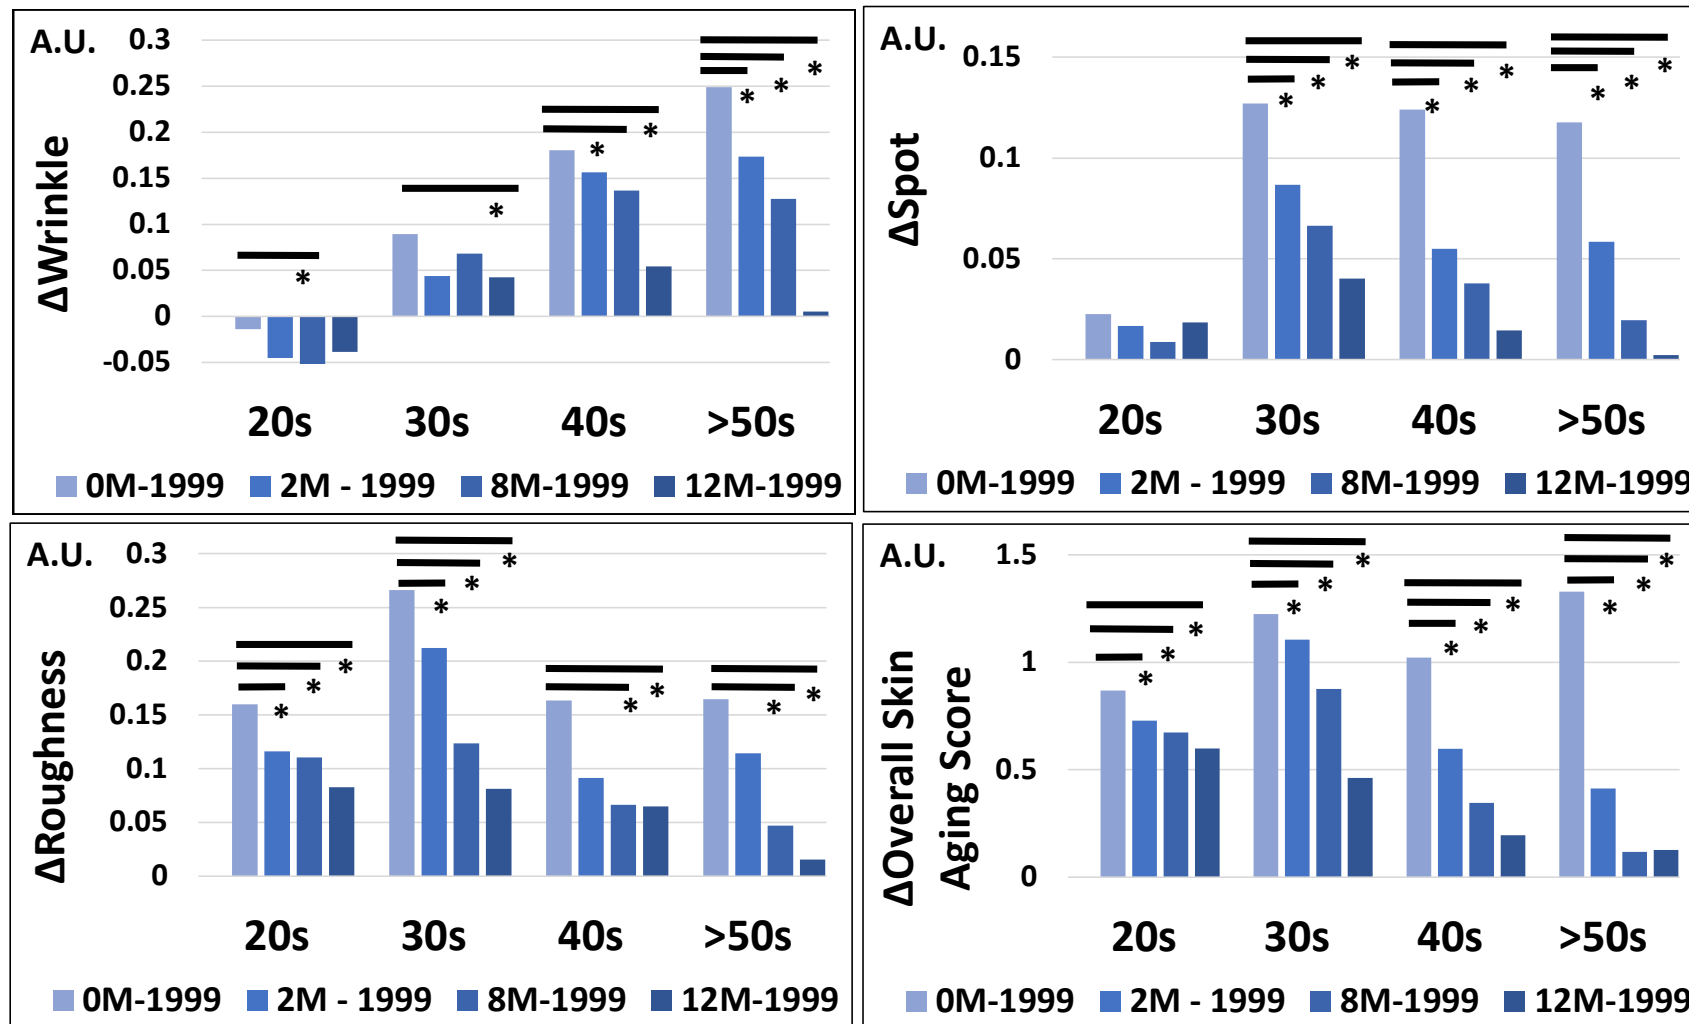

Supplement: s1 [file s1]
